# Supplementary material for: Gabapentin Increases Intra-Epidermal and Peptidergic Nerve Fibers Density and Alleviates Allodynia and Thermal Hyperalgesia in a Mouse Model of Acute Taxol-Induced Peripheral Neuropathy
Source: Biomedicines. 2022 Dec 8;10(12):3190. doi: 10.3390/biomedicines10123190 (PMC9775678; doi:10.3390/biomedicines10123190)
Supplement: Supplementary file 1 [file biomedicines-10-03190-s001.zip]

Archive with 5 entries (5 files):
- Data Set S4 IENFand GCPR number for all endpoints.xlsx
- Data Set S3 Hot Plate for all endpoints.xlsx
- Arrive Author Checklist Klazas M et al 1-12-2022 Biomedicines.pdf
- Data Set S1 Von Frey for all endpoints.xlsx
- Data Set S2 Tail Flick for all endpoints.xlsx
