# Supplementary material for: Gabapentin Increases Intra-Epidermal and Peptidergic Nerve Fibers Density and Alleviates Allodynia and Thermal Hyperalgesia in a Mouse Model of Acute Taxol-Induced Peripheral Neuropathy
Source: Biomedicines. 2022 Dec 8;10(12):3190. doi: 10.3390/biomedicines10123190 (PMC9775678; doi:10.3390/biomedicines10123190)
Supplement: Supplementary file 1 [file biomedicines-10-03190-s001.zip › Data Set S1 Von Frey for all endpoints.xlsx]

## Sheet: Von Frey force raw data
Data Set S1:Von Frey force for all endpoints
Days	Healthy																		Disease-Vehicle																		Disease-Gabapentin
	A:Y1	A:Y2	A:Y3	A:Y4	A:Y5	A:Y6	A:Y7	A:Y8	A:Y9	A:Y10	A:Y11	A:Y12	A:Y13	A:Y14	A:Y15	A:Y16	A:Y17	A:Y18	B:Y1	B:Y2	B:Y3	B:Y4	B:Y5	B:Y6	B:Y7	B:Y8	B:Y9	B:Y10	B:Y11	B:Y12	B:Y13	B:Y14	B:Y15	B:Y16	B:Y17	B:Y18	C:Y1	C:Y2	C:Y3	C:Y4	C:Y5	C:Y6	C:Y7	C:Y8	C:Y9	C:Y10	C:Y11	C:Y12	C:Y13
-1	1.5	1.7	1.5	1.6	1.6	1.4	1.4	1.4	1.4	1.6	1.6	1.5	1.5	1.4	1.4	1.4	1.6	1.5	1.1	1.5	1.6	1.6	1.7	1.5	1.5	1.6	1.4	1.5	1.3	1.4	1.3	1.6	1.6	1.4	1.5	1.6	1.4	1.4	1.4	1.4	1.5	1.5	1.5	1.6	1.8	1.5	1.4	1.5	1.4
4	1.6	1.8	1.8	1.9	1.8	1.7	1.7	1.5	1.5	1.5	1.5	1.6	1.5	1.6	1.7	1.6	1.7	1.5	1.1	1.2	1.1	1	1.1	1.2	1.1	1.2	1.2	1.3	1.1	1.1	1	1.1	1.2	1	1.2	1.2	1.1	1.2	1.1	1	1.1	1.2	1.1	1.2	1.2	1.3	1.1	1.1	1
8	1.6	1.6	1.9	1.8	1.7	1.7	1.5	1.5	1.5	1.5	1.6	1.6	1.6	1.6	1.6	1.6	1.6	1.7	0.6	0.7	0.5	0.7	0.5	0.8	0.4	0.5	0.5	0.6	0.6	0.6	0.6	0.7	0.6	0.6	0.6	0.5	0.6	0.7	0.5	0.7	0.5	0.8	0.4	0.5	0.5	0.6	0.6	0.6	0.6
10	1.6	1.8	1.8	1.9	1.8	1.7	1.7	1.5	1.5	1.5	1.5	1.6	1.5	1.5	1.6	1.7	1.6	1.7	0.3	0.5	0.3	0.5	0.2	0.6	0.5	0.3	0.3	0.3	0.3	0.3	0.4	0.4	0.2	0.3	0.3	0.4	1.1	1.2	1.2	1.3	1.3	1.1	1.2	1.4	1.4	1.4	1.2	1.5	1.2
12	1.6	1.6	1.8	1.9	1.8	1.6	1.7	1.5	1.5	1.5	1.5	1.6	1.5	1.5	1.6	1.6	1.6	1.5	0.2	0.2	0.2	0.2	0.2	0.2	0.2	0.3	0.4	0.1	0.2	0.2	0.2	0.3	0.2	0.2	0.2	0.3	1.3	1	1.2	1.3	1.4	1.5	1.4	1.4	1.5	1.2	1.3	1.3	1.3
14	1.6	1.6	1.6	1.9	1.8	1.7	1.7	1.5	1.5	1.5	1.5	1.6	1.6	1.6	1.6	1.6	1.6	1.7	0.2	0.2	0.2	0.2	0.2	0.2	0.2	0.3	0.4	0.1	0.2	0.2	0.2	0.3	0.2	0.2	0.2	0.3	1.3	1.3	1.3	1.4	1.5	1.4	1.4	1.5	1.2	1.5	1.5	1.3	1.5
16	1.6	1.6	1.6	1.9	1.8	1.7	1.7	1.5	1.5	1.5	1.5	1.6	1.6	1.6	1.6	1.6	1.6	1.7	0.2	0.2	0.2	0.2	0.2	0.2	0.2	0.3	0.4	0.1	0.2	0.2	0.2	0.3	0.2	0.5	0.2	0.3	1.3	1.3	1.4	1.5	1.4	1.4	1.6	1.2	1.5	1.5	1.3	1.6	1.5
20	1.6	1.6	1.6	1.9	1.6	1.7	1.6	1.5	1.5	1.6	1.5	1.6	1.6	1.6	1.6	1.6	1.6	1.7	0.2	0.2	0.2	0.2	0.2	0.2	0.2	0.3	0.4	0.1	0.2	0.2	0.2	0.3	0.2	0.5	0.2	0.3	1.4	1.5	1.4	1.4	1.5	1.4	1.4	1.6	1.2	1.6	1.7	1.3	1.6
21	1.6	1.8	1.8	1.9	1.8	1.7	1.7	1.5	1.5	1.5	1.5	1.6	1.5	1.5	1.6	1.7	1.6	1.7	0.2	0.2	0.2	0.2	0.2	0.2	0.2	0.3	0.4	0.1	0.2	0.2	0.2	0.3	0.2	0.2	0.5	0.3	1.4	1.5	1.4	1.4	1.4	1.5	1.4	1.4	1.6	1.2	1.6	1.7	1.3
[truncated: 5 more columns]

## Sheet: Von  Frey force Statistics
Data Set S1:Von Frey force for all endpoints statistics
Days	Healthy			Disease vehicle			Disease Gabapentin
	Mean	SEM	N	Mean	SEM	N	Mean	SEM	N
-1	1.5	0.0228665	18	1.48333	0.0345371	18	1.45	0.0294281	18
4	1.63889	0.0303992	18	1.13333	0.019803	18	1.13333	0.019803	18
8	1.62222	0.0249909	18	0.588889	0.0227071	18	0.627778	0.032141	18
10	1.63889	0.0303992	18	0.355556	0.025848	18	1.22941	0.0329491	17
12	1.60556	0.0285513	18	0.222222	0.0152443	18	1.35556	0.0354451	18
14	1.62222	0.0249909	18	0.222222	0.0152443	18	1.44706	0.0344256	17
16	1.62222	0.0249909	18	0.238889	0.0216008	18	1.47059	0.038122	17
20	1.61111	0.0212192	18	0.238889	0.0216008	18	1.5	0.0363803	17
21	1.63889	0.0303992	18	0.238889	0.0216008	18	1.47778	0.0297655	18
