# Supplementary material for: Gabapentin Increases Intra-Epidermal and Peptidergic Nerve Fibers Density and Alleviates Allodynia and Thermal Hyperalgesia in a Mouse Model of Acute Taxol-Induced Peripheral Neuropathy
Source: Biomedicines. 2022 Dec 8;10(12):3190. doi: 10.3390/biomedicines10123190 (PMC9775678; doi:10.3390/biomedicines10123190)
Supplement: Supplementary file 1 [file biomedicines-10-03190-s001.zip › Data Set S2 Tail Flick for all endpoints.xlsx]

## Sheet: Tail Flick raw data
Data Set S2: Tail Flick for all endpoints
Days	Healthy																		Disease-Vehicle																		Disease-Gabapentin
	A:Y1	A:Y2	A:Y3	A:Y4	A:Y5	A:Y6	A:Y7	A:Y8	A:Y9	A:Y10	A:Y11	A:Y12	A:Y13	A:Y14	A:Y15	A:Y16	A:Y17	A:Y18	B:Y1	B:Y2	B:Y3	B:Y4	B:Y5	B:Y6	B:Y7	B:Y8	B:Y9	B:Y10	B:Y11	B:Y12	B:Y13	B:Y14	B:Y15	B:Y16	B:Y17	B:Y18	C:Y1	C:Y2	C:Y3	C:Y4	C:Y5	C:Y6	C:Y7	C:Y8	C:Y9	C:Y10	C:Y11	C:Y12	C:Y13
-1	13	12	13	13	14	12	12	13	13	14	15	16	12	12	13	13	13	12	12	11	13	12	12	13	14	15	10	11	12	12	13	12	13	14	13	13	12	11	13	12	13	13	14	15	14	12	12	12	13
10	11	11	13	13	14	11	11	13	11	10	13	14	12	12	13	13	12	12	3	4	3	4	3	4	5	5	2	3	3	3	4	4	4	5	5	5	9	9	10	8	6	7	9	9	9	10	9	9	10
14	13	12	13	13	14	12	12	13	12	14	15	16	12	12	13	13	11	12	2	2	2	3	3	2	2	1	1	1	4	5	2	2	2	2	3	2	9	10	10	11	11	12	11	11	14	11	12	10	11
21	13	13	13	13	13	14	12	12	13	13	14	15	16	13	13	13	14	12	3	2	3	3	4	3	4	5	5	3	3	2	2	3	3	2	2	3	12	12	13	13	14	11	11	13	13	14	15	16	12
[truncated: 5 more columns]

## Sheet: Tail Flick statistics
Data Set S2: Tail Flick for all endpoints statistics
Days	Healthy			Disease-Vehicle			Disease-Gabapentin
	Mean	SEM	N	Mean	SEM	N	Mean	SEM	N
-1	13.0556	0.261622	18	12.5	0.282958	18	12.8333	0.23221	18
10	12.1667	0.271163	18	3.83333	0.217682	18	8.72222	0.239901	18
14	12.8889	0.290243	18	2.27778	0.239901	18	11.1111	0.254231	18
21	13.2778	0.239901	18	3.05556	0.220993	18	12.8333	0.305184	18
