# Supplementary material for: Gabapentin Increases Intra-Epidermal and Peptidergic Nerve Fibers Density and Alleviates Allodynia and Thermal Hyperalgesia in a Mouse Model of Acute Taxol-Induced Peripheral Neuropathy
Source: Biomedicines. 2022 Dec 8;10(12):3190. doi: 10.3390/biomedicines10123190 (PMC9775678; doi:10.3390/biomedicines10123190)
Supplement: Supplementary file 1 [file biomedicines-10-03190-s001.zip › Data Set S3 Hot Plate for all endpoints.xlsx]

## Sheet: Hot Plate raw data 
Data Set S3: Hot Plate for all endpoints
Days	Healthy																		Disease-Vehicle																		Disease-Gabapentin
	A:Y1	A:Y2	A:Y3	A:Y4	A:Y5	A:Y6	A:Y7	A:Y8	A:Y9	A:Y10	A:Y11	A:Y12	A:Y13	A:Y14	A:Y15	A:Y16	A:Y17	A:Y18	B:Y1	B:Y2	B:Y3	B:Y4	B:Y5	B:Y6	B:Y7	B:Y8	B:Y9	B:Y10	B:Y11	B:Y12	B:Y13	B:Y14	B:Y15	B:Y16	B:Y17	B:Y18	C:Y1	C:Y2	C:Y3	C:Y4	C:Y5	C:Y6	C:Y7	C:Y8	C:Y9	C:Y10	C:Y11	C:Y12	C:Y13
-1	9	8.8	9.9	9.2	8.9	8.9	9	9.1	8.7	8.9	8.9	8.9	8.9	8.8	9.2	9			8.8	8.6	9.9	9.2	8.9	8.9	9	9.1	9	8.5	8.6	8.7	8.8	8.9	8.8	8.9	8.9	9	8.9	8.8	9.9	9.2	8.9	8.9	9	9.1	9	8.8	8.6	8.7	9.1
8	9.1	9	9.2	9.9	9.2	8.9	8.9	9	9.1	9	8.7	8.9	9	8.9	9	8.8	9.2	9	6.2	6	6.1	6.9	6	6.2	5.8	5.5	6	6.2	6.4	6.2	6	6	6.1	5.9	6.9	6.3	7	7.7	7.5	7.1	8.1	8	8	6.2	6.6	6.9	6.7	7.4	7.7
13	9.4	9	8.9	9.9	9.2	8.9	9.4	9	9.1	9	9.7	9.9	8.9	8.9	9.9	9.4	9.2	9	5.9	5.3	6.4	6.2	6.3	5.5	5.6	5.7	5.8	5.2	5.3	5.2	5.1	5.2	5.9	5.8	5.6	5.8	8.1	8.8	8	7.9	7.8	7.5	8	8.2	8.3	8.1	8.8	7.8	7.9
20	9.4	9	8.8	9.9	9.2	9.9	8.9	9	9	9.4	9.3	8.9	9.4	9.4	9.4	9.2			4.5	5.3	5.2	5.3	5.5	4.4	4.6	4.7	4.8	4.5	4.5	4.5	4.6	4.7	4.4	4	4.1	4.9	9.4	9	8.8	9.9	9.6	9.6	8.9	9.6	9.1	9	9.4	9.3	8.9
[truncated: 5 more columns]

## Sheet: Hot Plate statistics
Data Set S3: Hot Plate for all endpoints statistics
Days	Healthy			Disease-Vehicle			Disease-Gabapentin
	Mean	SEM	N	Mean	SEM	N	Mean	SEM	N
-1	9.00625	0.0685983	16	8.91667	0.0715149	18	9	0.0646762	18
8	9.04444	0.059531	18	6.15	0.0797258	18	7.52778	0.150339	18
13	9.26111	0.0867492	18	5.65556	0.0933131	18	8.12778	0.0899548	18
20	9.25625	0.0816337	16	4.69444	0.0968363	18	9.28889	0.0799873	18
