# Supplementary material for: Gabapentin Increases Intra-Epidermal and Peptidergic Nerve Fibers Density and Alleviates Allodynia and Thermal Hyperalgesia in a Mouse Model of Acute Taxol-Induced Peripheral Neuropathy
Source: Biomedicines. 2022 Dec 8;10(12):3190. doi: 10.3390/biomedicines10123190 (PMC9775678; doi:10.3390/biomedicines10123190)
Supplement: Supplementary file 1 [file biomedicines-10-03190-s001.zip › Data Set S4 IENFand GCPR number for all endpoints.xlsx]

## Sheet: IENF GCRP numbers raw data
Data Set S4: IENFand GCPR number for all endpoints
	Healthy																		Disease- Vehicle																		Disease- Gabapentin
	A:Y1	A:Y2	A:Y3	A:Y4	A:Y5	A:Y6	A:Y7	A:Y8	A:Y9	A:Y10	A:Y11	A:Y12	A:Y13	A:Y14	A:Y15	A:Y16	A:Y17	A:Y18	B:Y1	B:Y2	B:Y3	B:Y4	B:Y5	B:Y6	B:Y7	B:Y8	B:Y9	B:Y10	B:Y11	B:Y12	B:Y13	B:Y14	B:Y15	B:Y16	B:Y17	B:Y18	C:Y1	C:Y2	C:Y3	C:Y4	C:Y5	C:Y6	C:Y7	C:Y8	C:Y9	C:Y10	C:Y11	C:Y12	C:Y13
IENF number	26	31	32	25	24	21	21	22	30	24	24	26	26	31	25	26	26	30	5	5	5	6	7	6	6	4	7	5	5	5	5	4	9	4	4	5	23	28	25	24	24	20	23	23	18	17	19	23	23
GCPR number	5	4	9	10	7	6	6	6											2	1	1	1	2	4	2	2											3	3	4	4	7	1	4	3
[truncated: 5 more columns]

## Sheet: IENF GCRP numbers statistics
Data Set S4: IENFand GCPR number for all endpoints statistics
	Healthy			Disease- Vehicle			Disease- Gabapentin
	Mean	SEM	N	Mean	SEM	N	Mean	SEM	N
IENF number	26.1111	0.803948	18	5.38889	0.303992	18	21.8889	0.641123	18
GCPR number	6.625	0.705527	8	1.875	0.350382	8	3.625	0.595744	8
